# Supplementary material for: Syn-thrusting, near-surface flexural-slipping and stress deflection along folded sedimentary layers of the Sant Corneli-Bóixols anticline (Pyrenees, Spain)
Source: Copernicus journal article supplement (doi:10.5194/se-8-405-2017), 2017-04-04
Supplement: Supplementary file [file se-8-405-2017-supplement-title-page.pdf › se-8-405-2017-supplement-title-page.pdf]

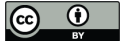

## *Supplement of*

# **Syn-thrusting, near-surface flexural-slipping and stress deflection along folded sedimentary layers of the Sant Corneli-Bóixols anticline (Pyrenees, Spain)**

**Stefano Tavani et al.**

*Correspondence to:* Stefano Tavani ([stefano.tavani@unina.it](mailto:stefano.tavani@unina.it))

- [se-8-405-2017-supplement-title-page.pdf](#)
- [Dataset.csv](#)

The copyright of individual parts of the supplement might differ from the CC-BY 3.0 licence.
